# Supplementary material
Source: Elsevier journal article supplement (https://www.sciencedirect.com/science/article/pii/S0213911117303114)
Supplement: mmc1 [file S0213911117303114:mmc1.docx]

­­

**Apéndice**

**Tabla I**

Características principales de los artículos seleccionados en la revisión integrativa

| **Autores/as (año), país** | **Objetivo** | **Diseño** | **Tamaño de muestra y características** | **Principales resultados** |
| --- | --- | --- | --- | --- |
| Carroll (1988), Australia | Enfatizar la importancia del sobrellamado conocimiento tácito en la resolución de problemas en el medio clínico | Estudio transversal con cuestionarios (escala NORTON de 1975 y la versión modificada de un cuestionario formulado por Ek y Boman en 1982) | Pacientes con úlceras por presión (n = 13) | El conocimiento tácito influye en el análisis de la situación clínica influenciado por sus creencias y la planificación personal de los cuidados |
| Meerabeau (1991), Reino Unido | Destacar la importancia del conocimiento experto, argumentar el rechazo de su uso como recurso en el ámbito académico y explorar la dificultad metodológica en su estudio | Discusión teórica | Estudios realizados por Benner (1984) y Schön (1987) sobre conocimiento experto | El conocimiento experto es de gran valor. Se aboga por la utilización de diseños investigadores colaborativos para estudiar este conocimiento. El conocimiento tácito es un recurso inexplorado |
| Fox (1997), Estados Unidos | Comparar varias teorías sobre inteligencia práctica para conocer qué estructura explica el conocimiento tácito en enfermería | Estudio transversal con cuestionarios (*Practical Knowledge Inventory for Nurses* [PKIN, Fox, 1994]) | Enfermeras (n = 132) | La estructura del conocimiento tácito puede ser considerada por tres conjuntos de habilidades *(managing others, tasks, self)* |
| Jones (1998), Reino Unido | Conocer la experiencia de las enfermeras y cómo este conocimiento puede ser utilizado por el supervisor repercutiendo en la atención a la comunidad | Estudio fenomenológico (narrativa de casos) | Enfermeras especialistas (n = 5) | El conocimiento tácito tiene la capacidad de aportar información sobre la práctica profesional a través de poderosas sinergias entre la teoría, la experiencia y el juicio personal |
| Carlsson et al. (2000), Suecia | Identificar las estrategias utilizadas por las enfermeras en la resolución de conflictos con pacientes agresivos y violentos en salud mental, y describir el conocimiento tácito utilizado para ello | Estudio fenomenológico (narrativa de casos) | Enfermeras (n = 2) y asistentes de enfermería (n = 3) de salud mental | Identifican siete categorías que permiten a la enfermera responder ante situaciones conflictivas de forma positiva |
| Welsh y Lyons (2001), Reino Unido | Examinar cómo las enfermeras pueden utilizar conocimiento formal combinado con otros tipos de conocimiento para llevar a cabo una valoración holística y desarrollar un plan de cuidados individualizado | Estudio de casos mediante análisis de contenido | Enfermeras de psiquiatría (n = 8) | Obtiene tres categorías: evidencia científica (uso del conocimiento tácito cuando la evidencia no es clara), conocimiento tácito (el juicio clínico es mediado por el conocimiento tácito) y habilidades de práctica (el conocimiento tácito y la intuición están relacionadas con el manejo de la práctica) |
| Herbig et al. (2001), Alemania | Desarrollar un método para explicar el conocimiento tácito en enfermería | Método Delphi (10 enfermeras expertas) para crear una simulación de una situación crítica. Entrevistas semiestructuradas siguiendo la técnica *repertory grid* de Kelly (1969) | Enfermeras (n = 16) | No hubo diferencias en el conocimiento explícito utilizado para tratar la situación. Con respecto al conocimiento tácito, los resultados muestran diferencias entre enfermeras novatas y expertas en la forma de evaluar el éxito de una intervención basándose en los sentimientos percibidos |
| Carlsson et al. (2002), Suecia | Presentar las entrevistas de reconstrucción *(re-enactment interviewing)* y proponer su uso para revelar el conocimiento tácito del cuidado | Teórico (análisis epistemológico) |  | Las entrevistas de reconstrucción permiten que el entrevistado sea consciente de los recuerdos y los sentimientos olvidados sobre una actividad concreta. Justifican la importancia del conocimiento tácito argumentando su utilización en toda práctica enfermera |
| Gabbay y Le May (2004), Reino Unido | Explorar cómo se realiza la toma de decisiones individual y colectiva | Estudio etnográfico (observación participante, entrevistas semiestructuradas y revisión documental) | Médicos (n = 9), enfermeras (n = 3) y flebotomista (n = 1) | Los clínicos raramente acceden y usan evidencia explícita de investigación u otros recursos directos, pero confían en sus *mindlines*. Estos son informados por lecturas breves y, principalmente, por su propia experiencia y la interacción con otros profesionales, y otros recursos de conocimiento tácito |
| Ribeiro Dos Santos (2005), Brasil | Trazar algunas consideraciones teóricas y conceptuales sobre el sistema de información en enfermería, buscando situar el conocimiento basado en las evidencias de la práctica clínica para construir un modelo de sistema integrando las estructuras conceptuales | Discusión teórica |  | El sistema de información enfermero debe ser estructurado a partir del conocimiento tácito y explícito. Este sistema debe ser insertado en el entorno de la organización con el fin de facilitar el registro de enfermería y agilizar el proceso de trabajo a través de la integración de un vocabulario, la clasificación y el lenguaje universalmente aceptado |
| Brooks y Scott (2006), Reino Unido | Conocer las perspectivas de las enfermeras y matronas sobre la utilización del sistema informático | Teoría fundamentada (foros, entrevistas semiestructuradas y grupos focales) | Enfermeras (n = 30) y matronas (n = 12) | La plataforma fue utilizada para intercambiar conocimiento tácito en su comunidad de práctica. La discusión *online* facilitó el intercambio y el crecimiento del conocimiento de las profesionales |
| Friedman y Bernell (2006), Estados Unidos | Evaluar cómo el conocimiento tácito y las características del equipo en conjunto influyen en el rendimiento de los equipos de cirugía cardiotorácica | Cualitativo, estudio exploratorio (observación y entrevistas semiestructuradas) | Cirujanos, médicos, perfusionistas, anestesistas, enfermeras quirúrgicas, técnicos quirúrgicos (no se especifica el número) | El conocimiento tácito, la composición del equipo, la comunicación y la confianza son esenciales para el éxito del rendimiento del equipo |
| Strandberg et al. (2007), Suecia | Explorar el significado percibido de la visión holística en médicos generales y enfermeras de distrito | Cualitativo, análisis de contenido (grupos focales) | Médicos (n = 22) y enfermeras (n = 20) de atención primaria | Se identificaron tres categorías: actitud, conocimiento y circunstancias. La utilización de una visión holística no solo es el conocimiento de los hechos, sino que también trata de los sentimientos y la competencia social (relacionados con el conocimiento tácito) |
| Greenhalgh y Long (2008), Reino Unido | Explorar la contribución que realizan las escalas de valoración estandarizada en la toma de decisiones clínica | Cualitativo, estudio de casos (observación no participante, entrevistas semiestructuradas y recopilación de datos documentales) | Medicina, enfermería, fisioterapia, terapia del habla, terapia ocupacional, psicología clínica y trabajo social (16 grupos multidisciplinarios y 11 entrevistas, no especifica el número de cada profesión) | La producción y la aplicación práctica de los resultados de escalas de valoración estandarizada en la práctica implicaron una interacción dinámica de los conocimientos tácito y explícito |
| Hunter et al. (2008), Australia | Identificar cómo las enfermeras clínicas aprenden entre sí en su lugar de trabajo | Estudio etnográfico (observación participante y entrevistas en profundidad) | Enfermeras clínicas (n = 32), médicos (n = 14), trabajadores de la salud (n = 5), educadora de enfermería (n = 1), enfermera clínica consultora (n = 1), enfermera supervisora (n = 1), especialistas médicos (n = 5) y administrativo (n = 1) | El aprendizaje interactivo e interpersonal y la transferencia de conocimientos incluyen el conocimiento codificado y tácito, así como la comprensión intuitiva de «cómo hacemos las cosas aquí» |
| Cader et al. (2009), Reino Unido | Estudiar los procesos de pensamiento (los criterios) de las enfermeras usados cuando evalúan información web relacionada con la práctica enfermera | Teoría fundamentada (entrevistas semiestructuradas y grupos focales) | Enfermeras (n = 33) | El conocimiento tácito junto con otros (conocimiento de proceso, conocimiento proposicional, la intuición y la cognición cuasi-racional) se utilizaron para la valoración de la facilidad del uso de información en Internet |
| Kinsella (2009), Canadá | Discernir afirmaciones filosóficas sobre la práctica reflexiva para avanzar incrementando las interpretaciones coherentes y considerar las implicaciones para las concepciones del conocimiento profesional en la vida laboral | Teórico. Análisis epistemológico de la práctica reflexiva a partir de las influencias filosóficas que ha recibido | El estudio se basa en la obra de Donald Schön y en textos de cuatro filósofos: John Dewey, Nelson Goodman, Michael Polanyi y Gilbert Ryle | La teoría de la práctica reflexiva se ocupa de profundas cuestiones epistemológicas de importancia para las concepciones del conocimiento en las profesiones de ámbito sanitario y social |
| Konstos y Naglie (2009), Canadá | Argumentar que la individualidad encarnada *(embodied selfhood)* es fundamental para el conocimiento tácito del cuidado | Cualitativo, investigación basada en el drama (simulación teatral de una situación clínica) y grupos focales | Profesionales del cuidado de pacientes con demencia (n = 43): enfermeras (n = 16), terapeutas ocupacionales (n = 10), fisioterapeutas (n = 8), terapeutas recreativos (n = 7) y trabajadores de apoyo personal (n = 2) | Argumentan la necesidad de realizar un análisis del conocimiento tácito no desde la experiencia de la práctica clínica en sí, sino de lo expresado y conocido a través del cuerpo, el yo mismo y las relaciones con los pacientes |
| Bakker et al. (2010), Canadá | Explorar las percepciones de la enfermería oncológica sobre la contratación y la permanencia en el puesto de trabajo, y las estrategias de trabajo que podrían fortalecer los ambientes de práctica en oncología | Investigación Acción participación (grupos focales) | Enfermeras en oncología (n = 91) | Las categorías que emergieron fueron: «la enfermería oncológica como especialidad», «el conocimiento tácito ya no es suficiente», «la satisfacción como factor de permanencia» y «relaciones dependientes con el medio». La formación de la enfermería en oncología debe incluir conocimientos específicos y experiencia en el servicio |
| Rangachari et al. (2010), Estados Unidos | Conseguir un entendimiento básico de la estructura de la comunicación en red, el contenido de la comunicación y los resultados en una unidad médica de cuidados intensivos que experimentan tasas de infección en vías venosas centrales por encima de lo esperado | Estudio descriptivo transversal (cuestionario *Central Line Infection Prevention Communication Logs* registrado una vez a la semana durante 4 semanas de forma individual en cada subgrupo profesional y nivel jerárquico de la unidad clínica) | Médicos facultativos (n = 2), enfermeras (n = 32), residentes (n = 2), estudiantes (n = 2), supervisores de la unidad (n = 3), gestores del hospital (n = 5) | Hay una escasa estructura de comunicación con una mínima interacción de los subgrupos profesionales y los niveles jerárquicos. Principalmente se intercambia el conocimiento explícito sobre los temas de infección general en comparación con el conocimiento tácito sobre las prácticas específicas de prevención de la infección |
| Reinders (2010), Países Bajos | Argumentar que una alta calidad de relaciones personales entre los profesionales y los clientes es una condición necesaria del conocimiento profesional | Discusión teórica (análisis filosófico) | Basado en el concepto de conocimiento tácito de Michael Polanyi. Comenta los resultados de un estudio anterior (*The art of caring,* Wuertz y Reinders, 2009) | La consideración de la dimensión personal del conocimiento visibiliza el conocimiento práctico, el cual es generado con los clientes durante un periodo de tiempo largo, se refiere a la interacción de aspectos de su bienestar físico, mental y social, y refleja la complejidad de los problemas a los que estos clientes se enfrentan |
| Kothari et al. (2011), Canadá | Examinar cómo los practicantes aplican el conocimiento tácito en la planificación y la implementación de programas de salud pública | Estudio narrativo (entrevistas y grupos focales) | Enfermeras (n = 8) | Los trabajadores hacen uso del conocimiento tácito y explícito en su día a día. Además, el conocimiento tácito desempeña un papel importante en la interpretación y la implementación de los hallazgos de investigación |
| Kothari et al. (2012), Canadá | Conseguir un mayor entendimiento de cómo el conocimiento es utilizado para informar iniciativas en programas de salud pública | Estudio narrativo (*storytelling,* entrevistas y grupos focales) | Enfermeras (n = 24), entrevistas (no especifica el número de enfermeras de los grupos focales) | El análisis reveló diferentes formas en las cuales el conocimiento tácito fue usado para planificar el programa de salud pública. Incluyen descubrir la oportunidad, reunir un equipo y trabajar en los detalles del programa |
| Meagher-Stewart et al. (2012), Canada | Entender cómo los profesionales de servicios de salud pública definen el concepto de *Evidence-based decision making* (EIDM) y comunidades de práctica (CoP) | Cualitativo, análisis descriptivo (grupos de discusión y participación en dos talleres de consenso) | Enfermeras de sanidad pública (n = 73), enfermera licenciada (n = 1), consultores de práctica (n = 7), nutricionistas (n = 2), higienistas dentales (n = 4), promotores de salud (n = 2) y consultor de salud infantil (n = 1) | Los participantes reconocieron la importancia de la EIDM y la importancia de integrar evidencia explícita y tácita en el proceso de EIDM, que fue potenciado por la CoP. El conocimiento tácito, particularmente de los pares y la experiencia personal, fue el recurso de conocimiento preferido, con interacciones informales con los pares, siendo favorecido por las comunidades de práctica y apoyado por la evidencia basada en la toma de decisiones |
| Oduro-Mensah et al. (2013), Reino Unido | Explorar cómo y por qué se realiza la toma de decisiones por los profesionales de los servicios de maternidad y neonatos, y determinar las intervenciones apropiadas y necesitadas para apoyar su calidad y sus resultados maternales y neonatales relacionados | Método mixto, exploratorio, estudio transversal y descriptivo de casos (grupos focales y cuestionarios) | Profesionales de salud maternal (n = 15) y neonatal (n = 50) (no especifica cuántas enfermeras) | El conocimiento tácito fue el principal soporte en la toma de decisiones. Los protocolos y las guías de práctica clínica se utilizan cuando no se conoce el siguiente paso a seguir. La opinión de los clientes y la adaptación a sus necesidades influyen en la toma de decisiones |
| Becker et al. (2015), Alemania | Transferir el conocimiento tácito en conocimiento explícito y sistemático utilizando las tecnologías de la información y la comunicación | Estudio descriptivo prospectivo (cuestionario sobre la experiencia del usuario y entrevistas semiestructuradas) | Enfermeras (n = 7) | Las enfermeras valoraron positivamente su experiencia de aprendizaje mediante la utilización de la app, la cual les permitió ser más conscientes de su aprendizaje y fortalecerlo. Los investigadores valoran el uso de la información recabada por la app para conocer las dificultades relacionadas con la transferencia de conocimiento tácito |
| Calderón Espinosa et al. (2015), España | Conocer la utilización del conocimiento tácito por los actores en el proceso de atención a la salud materna | Mapeo sistemático | 30 referencias, publicadas entre 1997 y 2014 | La utilización del conocimiento tácito como fuente de evidencias para la toma de decisiones puede aportar dos elementos para dar mayor viabilidad a las intervenciones: permite desarrollar estrategias ajustadas al contexto donde se implementan los programas, y da legitimidad a las decisiones ante los actores directamente involucrados, que pueden reconocer en ellos su propio conocimiento |
| Farr y Cressey (2015), Reino Unido | Explorar cómo los profesionales de salud entienden y valoran su propia actuación y la calidad de su trabajo diario | Teoría fundamentada (entrevistas en profundidad) | Enfermeras (n = 21) | Los resultados mostraron la importancia del conocimiento tácito en contraposición al conocimiento explícito, la coproducción de la calidad del cuidado a través de la interacción de los profesionales y los pacientes, y el valor de los diálogos colectivos y los espacios de reflexión |
| Montesanti et al. (2015), Canadá | Examinar los factores que podrían influir en el uso de un marco general para la participación de la comunidad en poblaciones marginales, y mejorar los marcos conceptuales específicos del contexto para mejorar su relevancia para la comunidad de salud | Investigación participativa y comparación de casos (grupos focales) | Promotores de salud, trabajadores externos, proveedores de atención médica (médicos y enfermeras), planificadores sanitarios comunitarios, directores ejecutivos del CHC y miembros de la junta directiva de la comunidad (n = 28, no especifica el número de cada profesión) | Los resultados mostraron la dificultad para organizar las actividades de participación comunitaria siguiendo un único marco, siendo cuestionado su uso como guía en el diseño, la implantación y la evaluación. El conocimiento tácito, en forma de experiencia personal y profesional, y el conocimiento local sobre la población, tuvieron mayor influencia en la orientación de las actividades de participación comunitaria |
| Becerril-Montekio et al. (2016), Méjico y Nicaragua | Valorar el uso de las comunidades de práctica y el mapeo para la sistematización del conocimiento tácito y utilizarlo para priorizar los cambios necesarios para implementar programas de salud maternal | Investigación participativa (creación de comunidades de práctica y técnica de mapeo) | Enfermeras, médicos, gestores académicos y clínicos en México y Nicaragua (n = 200, no especifica el número de cada profesión) | La sistematización del conocimiento tácito permitió identificar las barreras para la implementación de programas y priorizar los programas percibidos como más necesarios |
| Bowen et al. (2016), UK | Explorar los factores que influyen en la toma de decisiones, concretamente en cómo la gestión de las decisiones se relaciona con el aumento de la experiencia | Estudio cualitativo (entrevistas semiestructuradas) | Médicos, enfermeras de emergencias y enfermeras tituladas (n = 15, no especifica el número de cada profesión) | La consulta a un profesional o compañero experto se percibió como una ventaja para la adquisición de conocimiento tácito a través del intercambio entre compañeros. La exposición a diferentes situaciones clínicas les permitió desarrollar su propio conocimiento tácito, el cual les permitió valorar el riesgo, alejándose de la toma de decisiones analítica al pensamiento intuitivo |
| Brummell et al. (2016), Reino Unido | Explorar cómo trabajan los profesionales de la salud en dos departamentos de emergencias tomando decisiones para comenzar, continuar o detener la resucitación | Estudio etnográfico (observación participante y entrevistas en profundidad) | Enfermeras (n = 19), paramédicos (n = 2) y médicos (n = 16) | El conocimiento experimental tácito adquirido permite a los practicantes manejar complejas situaciones de resucitación dentro de una estructura que facilita la toma de decisiones rápida |
| Hendriks et al (2016), Países Bajos | Aportar información sobre cómo las tecnologías de la información afectan al conocimiento explícito y tácito enfermero en el proceso de su trabajo y compromiso laboral | Estudio cuasiexperimental (pretest y postest, dos grupos experimentales y dos grupos control) | Enfermeras (n = 74) | La información recabada a través de la tecnología de la información de la salud no mejoró por sí sola el compromiso laboral de las enfermeras. De forma indirecta, mejora su entendimiento cognitivo del estado del paciente y contribuye en su sentido del compromiso laboral, el cual depende directamente del conocimiento tácito |
| Lees-Deutsch et al. (2016), Reino Unido | Permitir a las enfermeras, profesionales y administradores distinguir entre mejorar, ampliar o avanzar la práctica, y clarificar los puntos de progresión e integración del «avance» en torno a la medicina de agudos | Discusión teórica (enfoque pragmático interpretado a través del marco conceptual) | Enfermeras de la unidad médica de agudos (n = 70) asistentes a la conferencia internacional de la Society Acute Medicine (Manchester, 2015) | Plantea la utilización de un marco conceptual que permita acreditar a las enfermeras según su experiencia. De esta manera, el conocimiento tácito sería parte del progreso de la carrera profesional de las enfermeras |
| Prahl et al. (2016), Suecia | Aumentar el entendimiento de cómo un modelo educativo es percibido por los profesionales dedicados al cuidado de personas mayores con demencia en un centro de día, y cómo pueden utilizar ese conocimiento en su práctica diaria | Estudio fenomenológico (entrevistas) | Asistentes de enfermería (n = 13) | Los profesionales percibieron la importancia del conocimiento, trabajando juntos y creando sentido de compañerismo. La participación de los profesionales en el programa educativo ha hecho que se den cuenta y reconozcan su conocimiento tácito y la importancia de la reflexión en acción juntos en equipo |
